# Supplementary material for: Dengue Virus Serotypes 1 and 2 Responsible for Major Dengue Outbreaks in Nepal: Clinical, Laboratory, and Epidemiological Features
Source: PubMed Central journal article supplement (PMC5637613; doi:10.4269/ajtmh.17-0221), 2017-07-31
Supplement: tpmd170221.SD1.pdf [file tpmd170221.SD1.pdf]

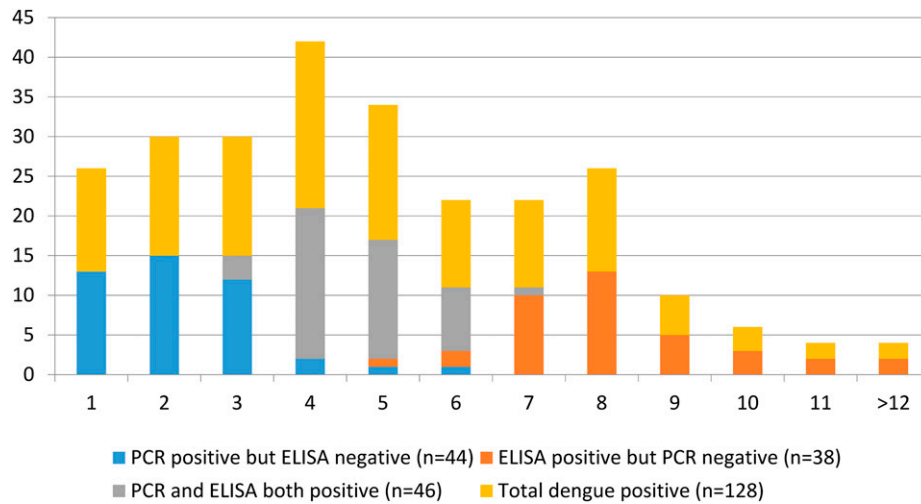

SUPPLEMENTAL FIGURE 1. Dengue detection by single serology and PCR according to postonset of illness (days). ELISA = enzyme linked immunosorbent assay; RT-PCR = reverse transcription polymerase chain reaction. X-axis indicates days postonset of illness and Y-axis indicates number of patients.

SUPPLEMENTAL TABLE 1  
Primers used in RT-PCR and nested PCR of DENV RNA for detection and serotyping

| Primer name* | Amplification type | Sequence (5'→3')                       | Priming position | Amplicon size in bp (primers) |
|--------------|--------------------|----------------------------------------|------------------|-------------------------------|
| D1           | RT-PCR, Nested PCR | TCA ATA TGC TGA AAC GCG CGA GAA ACC G  | 134–161†         | –                             |
| D2           | RT-PCR             | TTG CAC CAA CAG TCA ATG TCT TCA GGT TC | 616–644          | 511 (D1, D2)                  |
| TS1          | Nested PCR         | CGT CTC AGT GAT CCG GGG G              | 581–599          | 482 (D1, TS1)                 |
| TS2          | Nested PCR         | CGC CAC AAG GGC CAT GAA CAG            | 232–252          | 119 (D1, TS2)                 |
| TS3          | Nested PCR         | TAA CAT CAT CAT GAG ACA GAG C          | 400–421          | 290 (D1, TS3)                 |
| TS4          | Nested PCR         | CTC TGT TGT CTT AAA CAA GAG A          | 506–521          | 392 (D1, TS4)                 |

DENV = dengue virus; RT-PCR = reverse transcription polymerase chain reaction. These primer sequences are adapted from a previously published report.<sup>24</sup>

\* D1 is a forward primer while the rest are reverse.

† Target priming position for D1 primer is slightly different depending upon the DENV serotype genome (118–145 for DENV-1, 134–161 for DENV-2, 132–159 for DENV-3, and 136–163 for DENV-4).
